# Supplementary material
Source: PubMed Central journal article supplement (PMC5083185)
Supplement: NIHMS791815-supplement-1.pdf [file NIHMS791815-supplement-1.pdf]

# **SUPPLEMENTARY MATERIALS**

**Genetic events in the progression of adenoid cystic carcinomas of the breast to high-grade  
triple-negative breast cancer**

Fusco et al.

Supplementary Tables 1-5

Supplementary Figure 1

**Supplementary Table 1:** List of antibodies, clones, dilutions, and antigen retrieval methods.

| <b>Marker</b>     | <b>Clone</b> | <b>Dilution</b> | <b>Antigen retrieval</b>                                 | <b>Company</b> |
|-------------------|--------------|-----------------|----------------------------------------------------------|----------------|
| ER                | EP1          | RTU             | Heat-induced epitope retrieval (HIER), Dako PT Link, 20' | DAKO           |
| PR                | PgR636       | RTU             | EnVision FLEX Target Retrieval Solution, high pH, 20'    | DAKO           |
| HER2 (HercepTest) | A0485        | RTU             | HercepTest Epitope Retrieval Solution, 40'               | DAKO           |
| Ki67              | MIB1         | 1:400           | ER2, 30'                                                 | DAKO           |
| CK7               | OV-TL 12/30  | 1:1600          | CC1, 24'                                                 | DAKO           |
| p63               | 4A4          | RTU             | CC1, 24'                                                 | Ventana        |
| c-Kit             | pAb          | 1:500           | CC1,32'                                                  | DAKO           |

CC1, Cell Condition 1 Solution, Ventana, Roche; RTU, ready-to-use.

**Supplementary Table 2:** Primers used for *MYB-NFIB* transcript detection by RT-PCR.

| Primer set | <i>MYB</i> primer (exon)/ sequence      | <i>NFIB</i> primer (exon)/sequence     | Exons tested |
|------------|-----------------------------------------|----------------------------------------|--------------|
| 1          | 1910 F: (14) 5'-AGCTCCGTTTTAATGGCACC-3' | 1096R (8c): 5'-GGGTATAAATGCCTGCCGTT-3' | 14-8c        |
| 2          | 1925 F: (14) 5'-GCACCAGCATCAGAAGATGA-3' | 1197R (9): 5'-CCGTAAGATGGGTGTCCTA-3'   | 14-9         |
| 3          | 1925 F (14): 5'-GCACCAGCATCAGAAGATGA-3' | 862R (8a): 5'-GCCAGGCACTTCCCTACTAC-3'  | 14-8a        |
| 4          | 1693 F (12): 5'-GCAGGATGTGATCAAACAGG-3' | 1197R (9): 5'-CCGTAAGATGGGTGTCCTA-3'   | 12-9         |
| 5          | 1432 F (10): 5'-CTCAGACTTGAAATGCCTTC-3' | 1197R (9): 5'-CCGTAAGATGGGTGTCCTA-3'   | 10-9         |
| 6          | 1334 F (9): 5'-CAGGGCACCATTCTGGATAA-3'  | 1952R (9): 5'-GTGCTGCAATTGCTGGTCTA-3'  | 9-9          |
| 7          | 1334 F (9): 5'-CAGGGCACCATTCTGGATAA-3'  | 1197R (9): 5'-CCGTAAGATGGGTGTCCTA-3'   | 9-9          |

Primers as previously described by Fehr et al, J Pathol 2011 and Martelotto et al, J Pathol 2015.

**Supplementary Table 3: List of the 254 genes and 341 genes included in the customized breast cancer and MSK-IMPACT targeted massively parallel sequencing assays, respectively.**

|    | Breast panel | MSK-IMPACT |     | Breast panel | MSK-IMPACT |     | Breast panel | MSK-IMPACT |     | Breast panel | MSK-IMPACT |
|----|--------------|------------|-----|--------------|------------|-----|--------------|------------|-----|--------------|------------|
| 1  | ABCA13       | ABL1       | 101 | GPS2         | ESR1       | 201 | RAD51C       | MUTYH      | 301 |              | SMARCB1    |
| 2  | ABCB1        | AKT1       | 102 | GRB2         | ETV1       | 202 | RAD51D       | MYC        | 302 |              | SMARCD1    |
| 3  | ADAMTSL1     | AKT2       | 103 | GRIN2A       | ETV6       | 203 | RAD52        | MYCL1      | 303 |              | SMO        |
| 4  | AGFG2        | AKT3       | 104 | GRIN2B       | EZH2       | 204 | RAD54B       | MYCN       | 304 |              | SOCS1      |
| 5  | AHNAK2       | ALK        | 105 | HECW1        | FAM123B    | 205 | RAD54L       | MYD88      | 305 |              | SOX17      |
| 6  | AK9          | ALOX12B    | 106 | HERC2        | FAM175A    | 206 | RAF1         | MYOD1      | 306 |              | SOX2       |
| 7  | AKAP9        | APC        | 107 | HIF1A        | FAM46C     | 207 | RB1          | NBN        | 307 |              | SOX9       |
| 8  | AKT1         | AR         | 108 | HIST1H3B     | FANCA      | 208 | RBBP8        | NCOR1      | 308 |              | SPEN       |
| 9  | AKT2         | ARAF       | 109 | HRAS         | FANCC      | 209 | RELN         | NF1        | 309 |              | SPOP       |
| 10 | AKT3         | ARID1A     | 110 | HRNR         | FAT1       | 210 | RICTOR       | NF2        | 310 |              | SRC        |
| 11 | ANK3         | ARID1B     | 111 | HSP90AA1     | FBXW7      | 211 | RIF1         | NFE2L2     | 311 |              | STAG2      |
| 12 | AOAH         | ARID2      | 112 | HSP90AB1     | FGF19      | 212 | RPGR         | NKX2-1     | 312 |              | STK11      |
| 13 | APC          | ARID5B     | 113 | HUWE1        | FGF3       | 213 | RPS6KB1      | NKX3-1     | 313 |              | STK40      |
| 14 | APOBEC1      | ASXL1      | 114 | IGF1R        | FGF4       | 214 | RPTOR        | NOTCH1     | 314 |              | SUFU       |
| 15 | APOBEC2      | ASXL2      | 115 | INPP4B       | FGFR1      | 215 | RUNX1        | NOTCH2     | 315 |              | SUZ12      |
| 16 | APOBEC3A     | ATM        | 116 | IRS1         | FGFR2      | 216 | SAAL1        | NOTCH3     | 316 |              | SYK        |
| 17 | APOBEC3C     | ATR        | 117 | JAK1         | FGFR3      | 217 | SF3B1        | NOTCH4     | 317 |              | TBX3       |
| 18 | APOBEC3D     | ATRX       | 118 | JAK2         | FGFR4      | 218 | SHC1         | NPM1       | 318 |              | TERT       |
| 19 | APOBEC3F     | AURKA      | 119 | KIT          | FH         | 219 | SHROOM4      | NRAS       | 319 |              | TET1       |
| 20 | APOBEC3G     | AURKB      | 120 | KMT2C        | FLCN       | 220 | SMO          | NSD1       | 320 |              | TET2       |
| 21 | APOBEC3H     | AXIN1      | 121 | KMT2D        | FLT1       | 221 | SOS1         | NTRK1      | 321 |              | TGFBR1     |
| 22 | APOBEC4      | AXIN2      | 122 | KRAS         | FLT3       | 222 | SPEN         | NTRK2      | 322 |              | TGFBR2     |
| 23 | ARAF         | AXL        | 123 | LAMA1        | FLT4       | 223 | SPRY1        | NTRK3      | 323 |              | TMEM127    |
| 24 | ARID1A       | B2M        | 124 | LAMA5        | FOXA1      | 224 | SPTA1        | PAK1       | 324 |              | TMPRSS2    |
| 25 | ATM          | BAP1       | 125 | MACF1        | FOXL2      | 225 | SRCAP        | PAK7       | 325 |              | TNFIP3     |
| 26 | ATN1         | BARD1      | 126 | MAP1A        | FOXP1      | 226 | STAT1        | PALB2      | 326 |              | TNFRSF14   |
| 27 | ATR          | BBC3       | 127 | MAP2K1       | FUBP1      | 227 | STAT3        | PARK2      | 327 |              | TOP1       |
| 28 | ATRX         | BCL2       | 128 | MAP2K2       | GATA1      | 228 | SVEP1        | PARP1      | 328 |              | TP53       |
| 29 | AURKA        | BCL2L1     | 129 | MAP2K3       | GATA2      | 229 | TBL1XR1      | PAX5       | 329 |              | TP63       |
| 30 | AURKB        | BCL2L11    | 130 | MAP2K4       | GATA3      | 230 | TBX3         | PBRM1      | 330 |              | TRAF7      |
| 31 | AURKC        | BCL6       | 131 | MAP2K6       | GNA11      | 231 | TENM1        | PDCD1      | 331 |              | TSC1       |
| 32 | BIRC5        | BCOR       | 132 | MAP3K1       | GNAQ       | 232 | TGFBR1       | PDGFRA     | 332 |              | TSC2       |
| 33 | BRAF         | BLM        | 133 | MAP3K10      | GNAS       | 233 | TGFBR2       | PDGFRB     | 333 |              | TSHR       |
| 34 | BRCA1        | BMPR1A     | 134 | MAP3K4       | GREM1      | 234 | TGFBR3       | PDPK1      | 334 |              | U2AF1      |
| 35 | BRCA2        | BRAF       | 135 | MAP4K4       | GRIN2A     | 235 | TOP2A        | PHOX2B     | 335 |              | VHL        |
| 36 | BRIP1        | BRCA1      | 136 | MAPK1        | GSK3B      | 236 | TP53         | PIK3C2G    | 336 |              | VTCN1      |
| 37 | CACNA1A      | BRCA2      | 137 | MAPK8        | H3F3C      | 237 | TP53BP1      | PIK3C3     | 337 |              | WT1        |
| 38 | CACNA1C      | BRD4       | 138 | MAPK9        | HGF        | 238 | TSC1         | PIK3CA     | 338 |              | XIAP       |
| 39 | CACNA1E      | BRIP1      | 139 | MDM2         | HIST1H1C   | 239 | TSC2         | PIK3CB     | 339 |              | XPO1       |
| 40 | CBFB         | BTK        | 140 | MDN1         | HIST1H2BD  | 240 | TYK2         | PIK3CD     | 340 |              | YAP1       |
| 41 | CDC25A       | CARD11     | 141 | MED12        | HIST1H3B   | 241 | UBR4         | PIK3CG     | 341 |              | YES1       |
| 42 | CDC25B       | CASP8      | 142 | MET          | HNF1A      | 242 | USP36        | PIK3R1     |     |              |            |
| 43 | CDC25C       | CBFB       | 143 | MGAM         | HRAS       | 243 | WDFY3        | PIK3R2     |     |              |            |
| 44 | CDH1         | CBL        | 144 | MGMT         | ICOSLG     | 244 | XBP1         | PIK3R3     |     |              |            |
| 45 | CDK1         | CCND1      | 145 | MLH1         | IDH1       | 245 | XPA          | PIM1       |     |              |            |
| 46 | CDK4         | CCND2      | 146 | MLH3         | IDH2       | 246 | XPC          | PLK2       |     |              |            |
| 47 | CDK6         | CCND3      | 147 | MRE11A       | IFNGR1     | 247 | XRCC1        | PMAIP1     |     |              |            |
| 48 | CDKN1A       | CNE1       | 148 | MSH2         | IGF1       | 248 | XRCC2        | PMS1       |     |              |            |
| 49 | CDKN1B       | CD274      | 149 | MSH3         | IGF1R      | 249 | XRCC3        | PMS2       |     |              |            |
| 50 | CDKN2A       | CD276      | 150 | MSH5         | IGF2       | 250 | ZFHX3        | PNRC1      |     |              |            |
| 51 | CDKN2B       | CD79B      | 151 | MSH6         | IKBKE      | 251 | ZFHX4        | POLE       |     |              |            |
| 52 | CEP164       | CDC73      | 152 | MST1L        | IKZF1      | 252 | ZFP36L1      | PPP2R1A    |     |              |            |
| 53 | CHD4         | CDH1       | 153 | MTOR         | IL10       | 253 | ZNF384       | PRDM1      |     |              |            |
| 54 | CHD6         | CDK12      | 154 | MUTYH        | IL7R       | 254 | ZNF703       | PRKAR1A    |     |              |            |
| 55 | CHEK1        | CDK4       | 155 | MXRA5        | INPP4A     | 255 |              | PTCH1      |     |              |            |
| 56 | CHEK2        | CDK6       | 156 | MYB          | INPP4B     | 256 |              | PTEN       |     |              |            |
| 57 | COL12A1      | CDK8       | 157 | NBEAL2       | INSR       | 257 |              | PTPN11     |     |              |            |
| 58 | CTCF         | CDKN1A     | 158 | NBN          | IRF4       | 258 |              | PTPRD      |     |              |            |
| 59 | CTNNB1       | CDKN1B     | 159 | NBPF1        | IRS1       | 259 |              | PTPRS      |     |              |            |
| 60 | CUBN         | CDKN2A     | 160 | NCOA3        | IRS2       | 260 |              | PTPRT      |     |              |            |
| 61 | DCHS2        | CDKN2B     | 161 | NCOR1        | JAK1       | 261 |              | RAC1       |     |              |            |
| 62 | DCLRE1C      | CDKN2C     | 162 | NCOR2        | JAK2       | 262 |              | RAD50      |     |              |            |
| 63 | DEPTOR       | CHEK1      | 163 | NEB          | JAK3       | 263 |              | RAD51      |     |              |            |
| 64 | DMC1         | CHEK2      | 164 | NF1          | JUN        | 264 |              | RAD51B     |     |              |            |
| 65 | DOCK11       | CIC        | 165 | NF2          | KDM5A      | 265 |              | RAD51C     |     |              |            |
| 66 | EGFR         | CREBBP     | 166 | NR1H2        | KDM5C      | 266 |              | RAD51D     |     |              |            |
| 67 | EIF4A2       | CRKL       | 167 | NRAS         | KDM6A      | 267 |              | RAD52      |     |              |            |
| 68 | EME1         | CRLF2      | 168 | PALB2        | KDR        | 268 |              | RAD54L     |     |              |            |
| 69 | EME2         | CSF1R      | 169 | PARP1        | KEAP1      | 269 |              | RAF1       |     |              |            |
| 70 | EPPK1        | CTCF       | 170 | PARP2        | KIT        | 270 |              | RARA       |     |              |            |
| 71 | ERBB2        | CTLA4      | 171 | PARP3        | KLF4       | 271 |              | RASA1      |     |              |            |

|     |         |         |     |        |         |     |  |         |
|-----|---------|---------|-----|--------|---------|-----|--|---------|
| 72  | ERBB3   | CTNNB1  | 172 | PAXIP1 | KRAS    | 272 |  | RB1     |
| 73  | ERBB4   | CUL3    | 173 | PCNXL2 | LATS1   | 273 |  | RBM10   |
| 74  | ERCC1   | DAXX    | 174 | PDGFRA | LATS2   | 274 |  | RECQL4  |
| 75  | ERCC2   | DCUN1D1 | 175 | PDGFRB | LMO1    | 275 |  | REL     |
| 76  | ERCC3   | DDR2    | 176 | PGR    | MAP2K1  | 276 |  | RET     |
| 77  | ERCC5   | DICER1  | 177 | PIK3CA | MAP2K2  | 277 |  | RFWD2   |
| 78  | ESR1    | DIS3    | 178 | PIK3CB | MAP2K4  | 278 |  | RHOA    |
| 79  | ESR2    | DNMT1   | 179 | PIK3R1 | MAP3K1  | 279 |  | RICTOR  |
| 80  | FAM157B | DNMT3A  | 180 | PLEC   | MAP3K13 | 280 |  | RIT1    |
| 81  | FANCA   | DNMT3B  | 181 | PLK1   | MAPK1   | 281 |  | RNF43   |
| 82  | FANCB   | DOT1L   | 182 | PLXNA4 | MAX     | 282 |  | ROS1    |
| 83  | FANCC   | E2F3    | 183 | PMS1   | MCL1    | 283 |  | RPS6KA4 |
| 84  | FANCD2  | EED     | 184 | PMS2   | MDC1    | 284 |  | RPS6KB2 |
| 85  | FANCE   | EGFL7   | 185 | POLB   | MDM2    | 285 |  | RPTOR   |
| 86  | FANCF   | EGFR    | 186 | POLD1  | MDM4    | 286 |  | RUNX1   |
| 87  | FANCG   | EIF1AX  | 187 | POLE   | MED12   | 287 |  | RYBP    |
| 88  | FANCI   | EP300   | 188 | POLH   | MEF2B   | 288 |  | SDHA    |
| 89  | FANCL   | EPCAM   | 189 | POLQ   | MEN1    | 289 |  | SDHAF2  |
| 90  | FANCM   | EPHA3   | 190 | PRKCA  | MET     | 290 |  | SDHB    |
| 91  | FBN1    | EPHA5   | 191 | PRKCB  | MITF    | 291 |  | SDHC    |
| 92  | FGFR1   | EPHB1   | 192 | PRKCD  | MLH1    | 292 |  | SDHD    |
| 93  | FGFR2   | ERBB2   | 193 | PRKCG  | MLL     | 293 |  | SETD2   |
| 94  | FGFR3   | ERBB3   | 194 | PRKD1  | KMT2C   | 294 |  | SF3B1   |
| 95  | FGFR4   | ERBB4   | 195 | PTCH1  | KMT2D   | 295 |  | SH2D1A  |
| 96  | FMN2    | ERCC2   | 196 | PTEN   | MPL     | 296 |  | SHQ1    |
| 97  | FOXA1   | ERCC3   | 197 | PTK2   | MRE11A  | 297 |  | SMAD2   |
| 98  | FOXC2   | ERCC4   | 198 | RAD50  | MSH2    | 298 |  | SMAD3   |
| 99  | FRG1B   | ERCC5   | 199 | RAD51  | MSH6    | 299 |  | SMAD4   |
| 100 | GATA3   | ERG     | 200 | RAD51B | MTOR    | 300 |  | SMARCA4 |

Gray: genes overlapping between the two sequencing panels.

**Supplementary Table 4:** Primer sets used for validation of mutations using amplicon re-sequencing.

| <b>Gene</b>    | <b>Forward</b>         | <b>Reverse</b>              |
|----------------|------------------------|-----------------------------|
| <i>NOTCH1</i>  | GAAGGGGTGCTCAGGCAC     | AGCCTCACCTGGTGCAGA          |
| <i>RPS6KB2</i> | AACTGACCGACTTTGGACTCTG | GGTTCTCTGCGGTGAAGG          |
| <i>EP300</i>   | ACATGGGGATGGGCACTA     | AAGGCAAACCCTCCATCC          |
| <i>MYB</i>     | CCTGATCTCAGAGGGTGGAG   | GGCTTACATTTTGTGCTTCAGA      |
| <i>KDM6A</i>   | GGTGATCGAATGGAGGCTAT   | AACTTATTGATGATTTCCATTTCCA   |
| <i>STAG2</i>   | GGCAGTTTCTTCTCTGTCCTTT | TATCATAATTAAACATCCTTACCTTCC |

**Supplementary Table 5.** Somatic single nucleotide variants (SNVs) and insertion/deletions (indels) identified in AdCCs and associated HG-TNBCs using massively parallel sequencing.

| Sample ID     | Gene    | Mutation type         | Amino acid | Chromosome | Position  | Reference allele | Alternative allele | Mutant allele fraction | Sequencing depth | Cancer cell fraction | Sequencing depth amplicon re-sequencing | Clonal/Subclonal mutation | Mutation Taster | CHASM     | Kandath et al. Nature 2013 | Cancer gene census | Lawrence et al. Nature 2014 | Validation  |
|---------------|---------|-----------------------|------------|------------|-----------|------------------|--------------------|------------------------|------------------|----------------------|-----------------------------------------|---------------------------|-----------------|-----------|----------------------------|--------------------|-----------------------------|-------------|
| AdCC1-Trab    | EP300   | STOP_GAINED           | R86*       | 22         | 41513352  | C                | T                  | 3.30%                  | 333              | 20%                  | 7300                                    | Subclonal                 | A               | .         | Yes                        | Yes                | Yes                         | MiSeq       |
| AdCC1-Trab    | EP300   | STOP_GAINED           | R202*      | 22         | 41513700  | C                | T                  | 8.70%                  | 242              | 53%                  | 7386                                    | Subclonal                 | A               | .         | Yes                        | Yes                | Yes                         | MiSeq       |
| AdCC1-Trab    | ERBB2   | NON_SYNONYMOUS_CODING | G292R      | 17         | 37866707  | G                | C                  | 1.21%                  | 494              | 7%                   | NA                                      | Subclonal                 | D               | Driver    | No                         | Yes                | Yes                         | Cross panel |
| AdCC1-Trab    | FGFR1   | NON_SYNONYMOUS_CODING | P314L      | 8          | 38282115  | G                | A                  | 1.0%                   | 394              | 6%                   | NA                                      | Subclonal                 | D               | Driver    | No                         | Yes                | No                          | Cross panel |
| AdCC1-Trab    | NOTCH1  | FRAME_SHIFT           | D2442fs    | 9          | 139390864 | C                | CGT                | 11.87%                 | 273              | 74%                  | 2124                                    | Subclonal                 | .               | .         | Yes                        | Yes                | Yes                         | MiSeq       |
| AdCC1-Trab    | NOTCH1  | FRAME_SHIFT           | G2430fs    | 9          | 139390901 | GC               | G                  | 16.10%                 | 264              | 97%                  | 6827                                    | Clonal                    | .               | .         | Yes                        | Yes                | Yes                         | MiSeq       |
| AdCC1-Trab    | RPS6KB2 | NON_SYNONYMOUS_CODING | R248Q      | 11         | 67200632  | G                | A                  | 9.00%                  | 299              | 55%                  | 3311                                    | Subclonal                 | D               | Passenger | No                         | No                 | No                          | MiSeq       |
| AdCC1-HG-TNBC | EP300   | STOP_GAINED           | R202*      | 22         | 41513700  | C                | T                  | 31.80%                 | 130              | 97%                  | 6145                                    | Clonal                    | A               | .         | Yes                        | Yes                | Yes                         | MiSeq       |
| AdCC1-HG-TNBC | ERBB2   | NON_SYNONYMOUS_CODING | G292R      | 17         | 37866707  | G                | C                  | 4.80%                  | 312              | 16%                  | NA                                      | Subclonal                 | D               | Driver    | No                         | Yes                | Yes                         | Cross panel |
| AdCC1-HG-TNBC | FGFR1   | NON_SYNONYMOUS_CODING | P314L      | 8          | 38282115  | G                | A                  | 14.30%                 | 231              | 48%                  | NA                                      | Subclonal                 | D               | Driver    | No                         | Yes                | No                          | Cross panel |
| AdCC1-HG-TNBC | NOTCH1  | FRAME_SHIFT           | D2442fs    | 9          | 139390864 | C                | CGT                | 29.49%                 | 286              | 100%                 | 7150                                    | Clonal                    | .               | .         | Yes                        | Yes                | Yes                         | MiSeq       |
| AdCC1-HG-TNBC | RPS6KB2 | NON_SYNONYMOUS_CODING | R248Q      | 11         | 67200632  | G                | A                  | 10.90%                 | 303              | 37%                  | 2854                                    | Subclonal                 | D               | Passenger | No                         | No                 | No                          | MiSeq       |
| AdCC2-Crib    | KMT2C   | NON_SYNONYMOUS_CODING | E3717K     | 7          | 151859513 | C                | T                  | 27.35%                 | 245              | 100%                 | NA                                      | Clonal                    | D               | Passenger | Yes                        | Yes                | Yes                         | Cross panel |
| AdCC2-Crib    | KMT2C   | NON_SYNONYMOUS_CODING | K339N      | 7          | 151962290 | C                | G                  | 2.78%                  | 144              | 12%                  | NA                                      | Subclonal                 | D               | Passenger | Yes                        | Yes                | Yes                         | Cross panel |
| AdCC2-Sol     | KMT2C   | NON_SYNONYMOUS_CODING | E3717K     | 7          | 151859513 | C                | T                  | 30.00%                 | 170              | 100%                 | NA                                      | Clonal                    | D               | Passenger | Yes                        | Yes                | Yes                         | Cross panel |
| AdCC2-Sol     | KMT2C   | NON_SYNONYMOUS_CODING | K339N      | 7          | 151962290 | C                | G                  | 5.56%                  | 90               | 40%                  | NA                                      | Subclonal                 | D               | Passenger | Yes                        | Yes                | Yes                         | Cross panel |
| AdCC2-Sol     | MYB     | NON_SYNONYMOUS_CODING | R190H      | 6          | 135513503 | G                | A                  | 4.98% (MiSeq)          | 1099 (MiSeq)     | 38% (MiSeq)          | 1099                                    | Subclonal                 | D               | Passenger | No                         | Yes                | No                          | MiSeq       |
| AdCC2-HG-TNBC | KMT2C   | NON_SYNONYMOUS_CODING | E3717K     | 7          | 151859513 | C                | T                  | 27.95%                 | 161              | 100%                 | NA                                      | Clonal                    | D               | Passenger | Yes                        | Yes                | Yes                         | Cross panel |
| AdCC2-HG-TNBC | KMT2C   | NON_SYNONYMOUS_CODING | K339N      | 7          | 151962290 | C                | G                  | 8.22%                  | 73               | 35%                  | NA                                      | Subclonal                 | D               | Passenger | Yes                        | Yes                | Yes                         | Cross panel |
| AdCC2-HG-TNBC | MYB     | NON_SYNONYMOUS_CODING | R190H      | 6          | 135513503 | G                | A                  | 8.55%                  | 234              | 45%                  | 865                                     | Subclonal                 | D               | Passenger | No                         | Yes                | No                          | MiSeq       |
| AdCC2-HG-TNBC | STAG2   | NON_SYNONYMOUS_CODING | L480F      | X          | 123195095 | C                | T                  | 14.89%                 | 94               | 49%                  | 7335                                    | Subclonal                 | D               | Passenger | Yes                        | Yes                | Yes                         | MiSeq       |
| AdCC2-HG-TNBC | KDM6A   | FRAME_SHIFT           | G100fs     | X          | 44820600  | AG               | A                  | 12.90%                 | 155              | 42%                  | 7694                                    | Subclonal                 | .               | .         | Yes                        | Yes                | Yes                         | MiSeq       |
| AdCC2-HG-TNBC | CDK12   | STOP_GAINED           | Q1216*     | 17         | 37682455  | C                | T                  | 6.87%                  | 131              | 36%                  | 1416                                    | Subclonal                 | .               | .         | Yes                        | Yes                | Yes                         | MiSeq       |

## Supplementary Figure 1

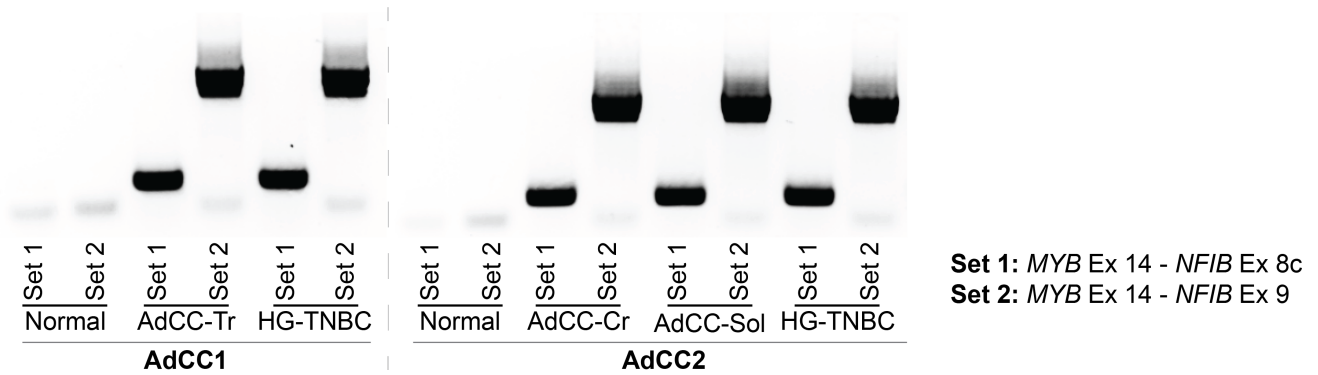

**Supplementary Figure 1:** Results of RT-PCR analysis assessing the presence and type of the *MYB-NFIB* fusion transcript. In all components of AdCC1 and AdCC2 the *MYB-NFIB* fusion transcript consisted of *MYB* exon 14 fused to *NFIB* exon 8c. AdCC-Cr, cribriform adenoid cystic carcinoma; AdCC-Sol, solid adenoid cystic carcinoma; AdCC-Tr, trabecular adenoid cystic carcinoma; Ex, exon; HG-TNBC, high-grade triple-negative breast cancer.
